# Supplementary material
Source: ML conference proceedings conference paper supplement (https://openreview.net/forum?id=ijJZbomCJIm)

Test Accuracy %

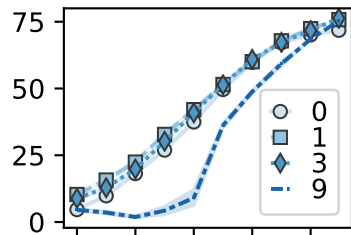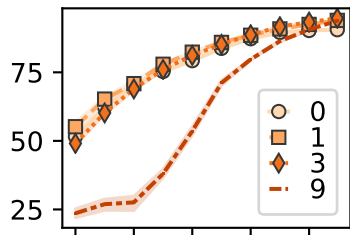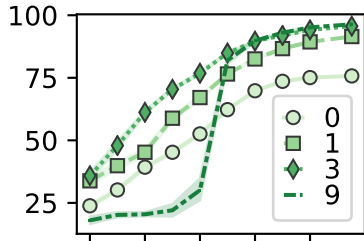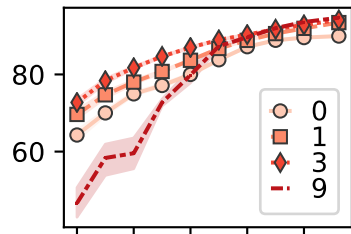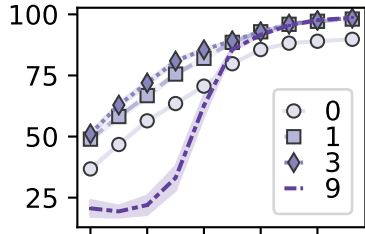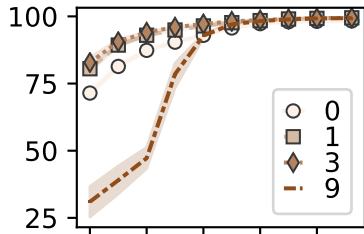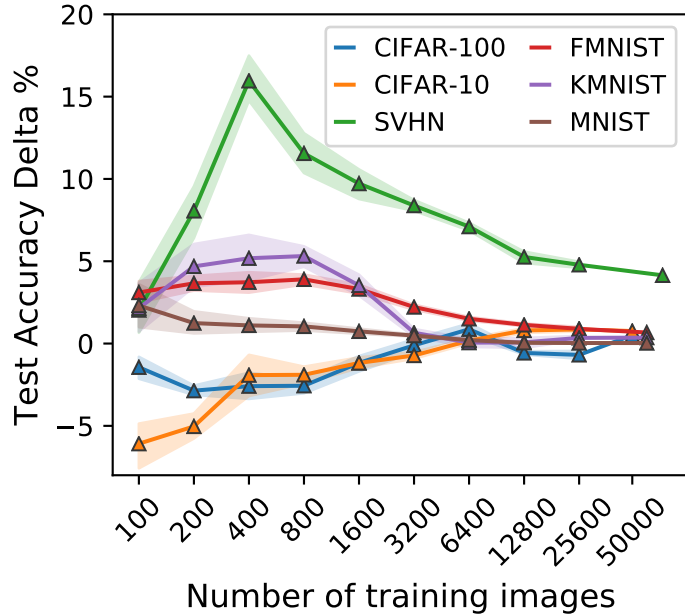

Number of training images

Number of training images

Supplement: supplementary_material [file attachment]

Test Accuracy %

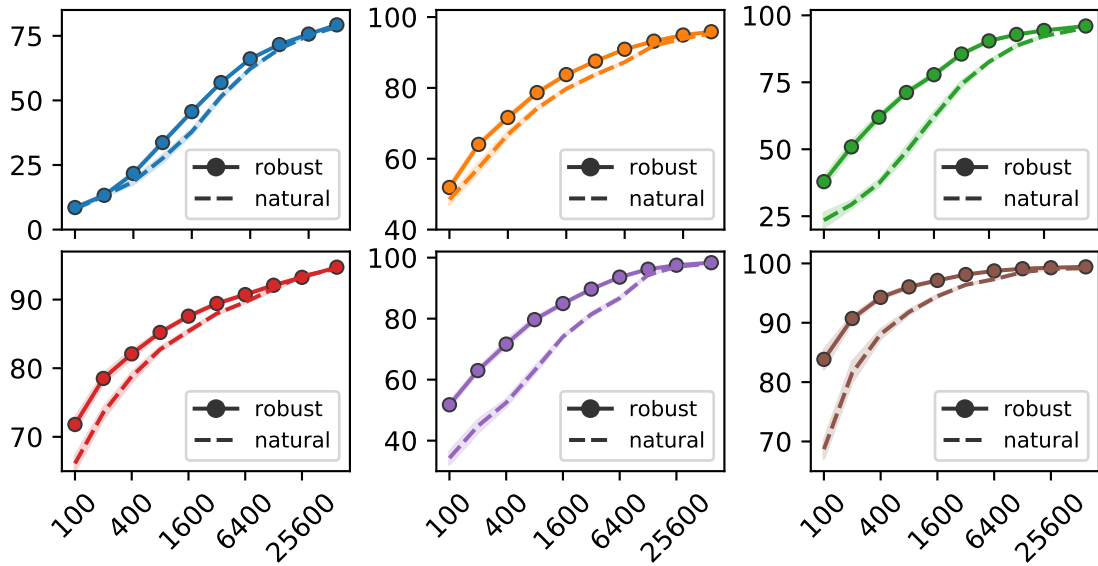

Number of training images

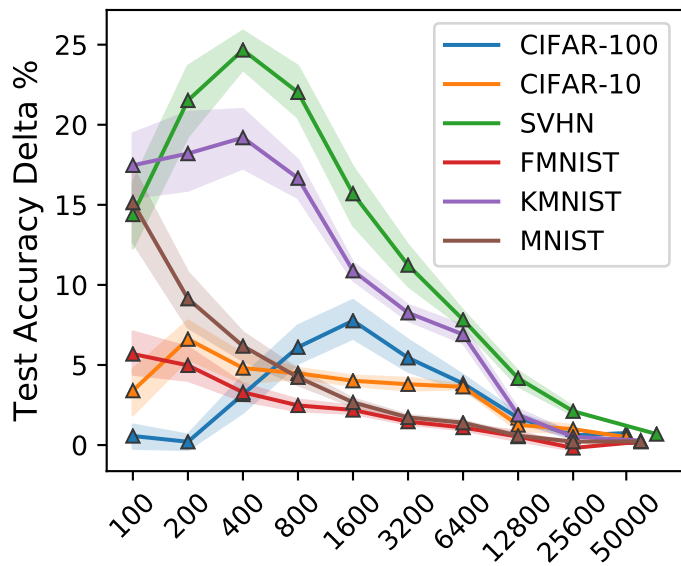

Number of training images

Supplement: supplementary_material [file attachment]

Test Accuracy %

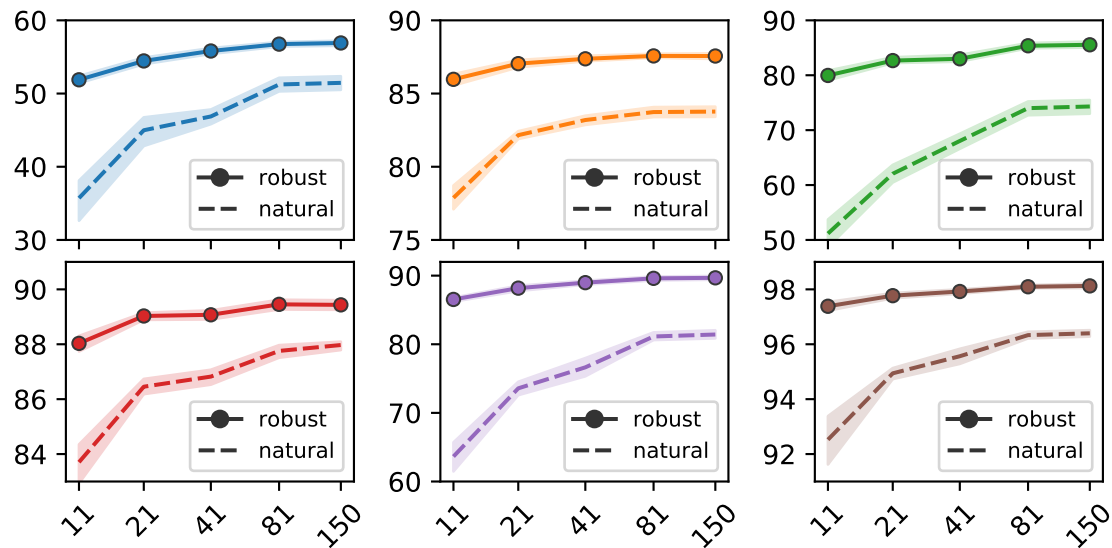

Number of training epochs

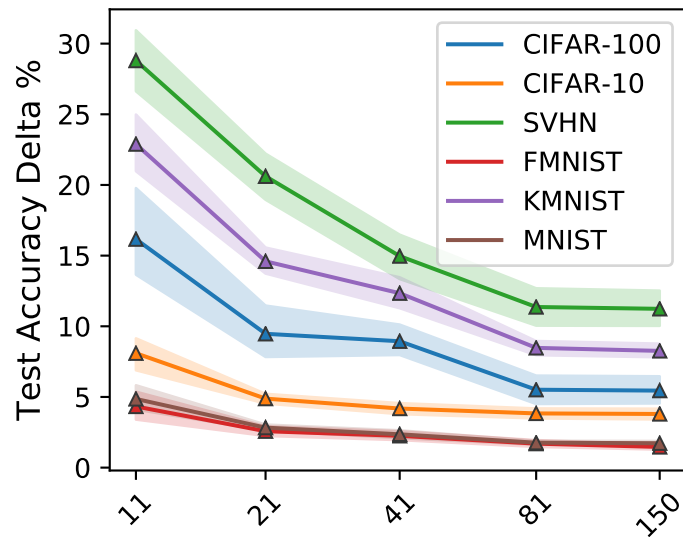

Number of training epochs

Supplement: supplementary_material [file attachment]
